# Supplementary material for: Mediation Effect of Suicide-Related Social Media Use Behaviors on the Association Between Suicidal Ideation and Suicide Attempt: Cross-Sectional Questionnaire Study
Source: J Med Internet Res. 2020 Apr 28;22(4):e14940. doi: 10.2196/14940 (PMC7218592; doi:10.2196/14940)
Supplement: Multimedia Appendix 1 [file jmir_v22i4e14940_app1.docx]

| Factors | Measure | Items |
| --- | --- | --- |
| Suicide ideation | The Adult Suicidal Ideation Questionnaire | I thought about killing myself |
| Others will be happier if I gone. |
| Suicide would solve my problems. |
| I would kill myself if I had chance. |
| Suicide attempt | One-item measure | Have you ever tried to kill yourself? |
| *Attended-to* a | Self-developed measure | Attended to suicidal news |
| Attended to friends who said they wanted to commit suicide |
| *Commented-reposted* b | Commented on / reposted suicide news |
| Commented on/reposted other people’s posts about killing themselves |
| *Talked-about* c | Talked about suicide in online suicidal communities |
| Talked on the website about one’s own concrete plan to commit suicide |

*a Attended to:* Attended to suicidal information;

*b* *Commented-reposted*: Commented on/reposted suicidal information;

*c* *Talked-about:* Talked-about suicide;
